# Supplementary material for: Positively charged, surfactant-free gold nanoparticles for nucleic acid delivery
Source: Royal Society of Chemistry journal article supplement (doi:10.1039/c4ra16294c), 2015-01-01
Supplement: c4ra16294c1.pdf [file c4ra16294c1.pdf]

## Supporting Information

# Positively Charged, Surfactant-Free Gold Nanoparticles for Nucleic Acid Delivery

Jianfeng Guo <sup>a</sup>, Mark Armstrong <sup>b, c</sup>, Caitriona M. O'Driscoll <sup>a</sup>

Justin D. Holmes <sup>b, c</sup> and Kamil Rahme <sup>b, c, d\*</sup>

<sup>a</sup> *Pharmacodelivery group, School of Pharmacy, University College Cork, Cork, Ireland*

<sup>b</sup> *Materials Chemistry and Analysis Group, Department of Chemistry and the Tyndall National Institute, University College Cork, Cork, Ireland*

<sup>c</sup> *Centre for Research on Adaptive Nanostructures and Nanodevices (CRANN), Trinity College Dublin, Dublin 2, Ireland*

<sup>d</sup> *Department of Sciences, Faculty of Natural and Applied Science, Notre Dame University (Louaize), Zouk Mosbeh, Lebanon*

**Table S1.** The concentration of Au NPs leading to 50 % cell growth inhibition (IC<sub>50</sub>) in human and mouse cancer cells.

|                      | Hep G2<br>( $\mu\text{g/mL}$ ) | Caco-2<br>( $\mu\text{g/mL}$ ) | PC3<br>( $\mu\text{g/mL}$ ) | B16F10<br>( $\mu\text{g/mL}$ ) | CT26<br>( $\mu\text{g/mL}$ ) |
|----------------------|--------------------------------|--------------------------------|-----------------------------|--------------------------------|------------------------------|
| 20 nm Au-CATB        | 3.1                            | 3.7                            | 2                           | 3.5                            | 3.5                          |
| 60 nm Au-CATB        | 3.2                            | 3.4                            | 3.5                         | 3.8                            | 3.8                          |
| RG5 AuNPs-Lcysteine  | 6.8                            | 7.8                            | 8.2                         | 9.2                            | 8.2                          |
| RG7 AuNPs-Lcysteine  | 7.2                            | 8.8                            | 7.8                         | 8.9                            | 8.1                          |
| RG8 AuNPs-Lcysteine  | 7.1                            | 8.5                            | 8.2                         | 8.5                            | 9.0                          |
| RG9 AuNPs-Lcysteine  | 6.7                            | 8.7                            | 7.4                         | 9.4                            | 8.7                          |
| RG11 AuNPs-Lcysteine | 6.9                            | 9.0                            | 8.5                         | 9.1                            | 8.4                          |
| RG12 AuNPs-Lcysteine | 7.0                            | 8.7                            | 8.0                         | 8.4                            | 9.1                          |

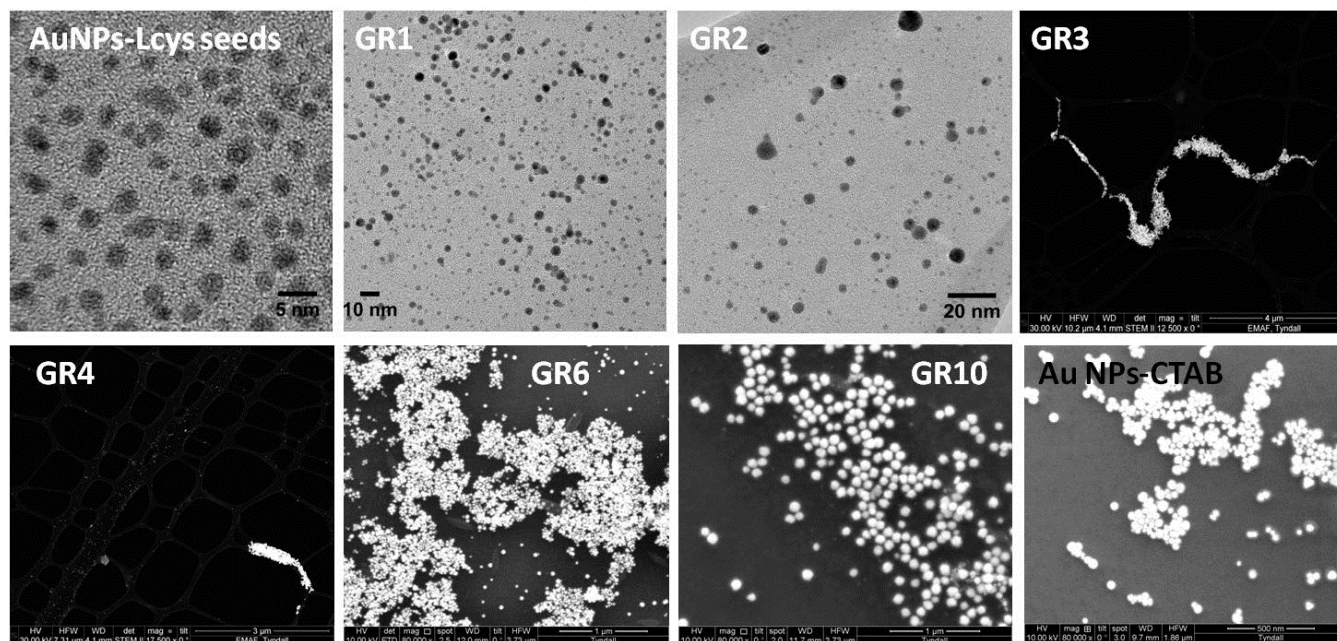

**Figure S1.** TEM (seeds, GR1 and GR2) and SEM of Au-L-cysteine nanoparticles produced in this study and not used in the cytotoxicity assays, with mean diameters of (seeds) ~2 nm, (GR1) ~4 nm, (GR2) ~5.5 nm, (GR3) ~7 nm, (GR4) ~9 nm, (GR6) ~46 nm, (GR10) ~118 nm. The sample (Au NPs-CTAB) ~60 nm was used as negative control for cytotoxicity comparison study.

(a)

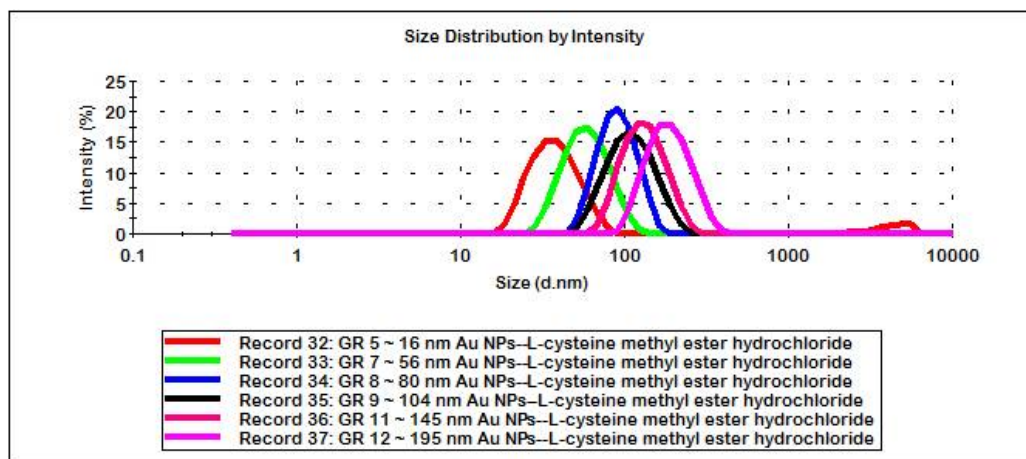

(b)

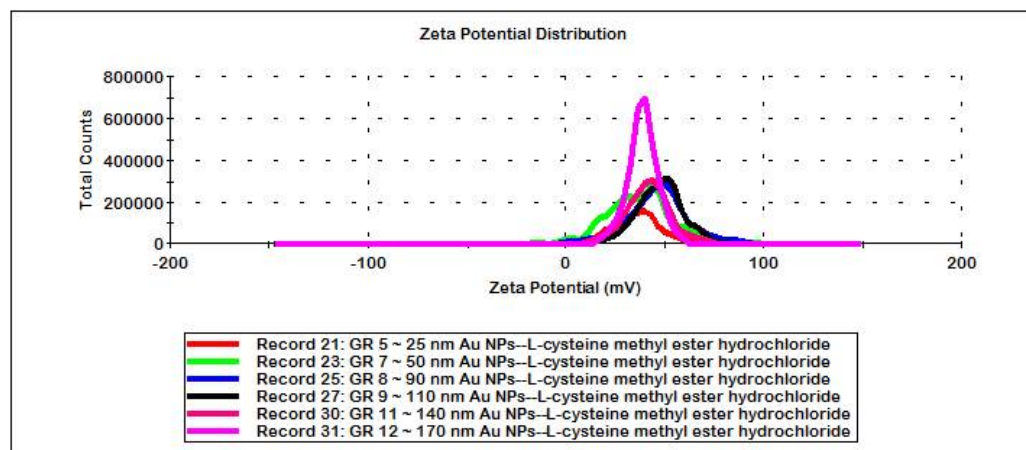

(c)

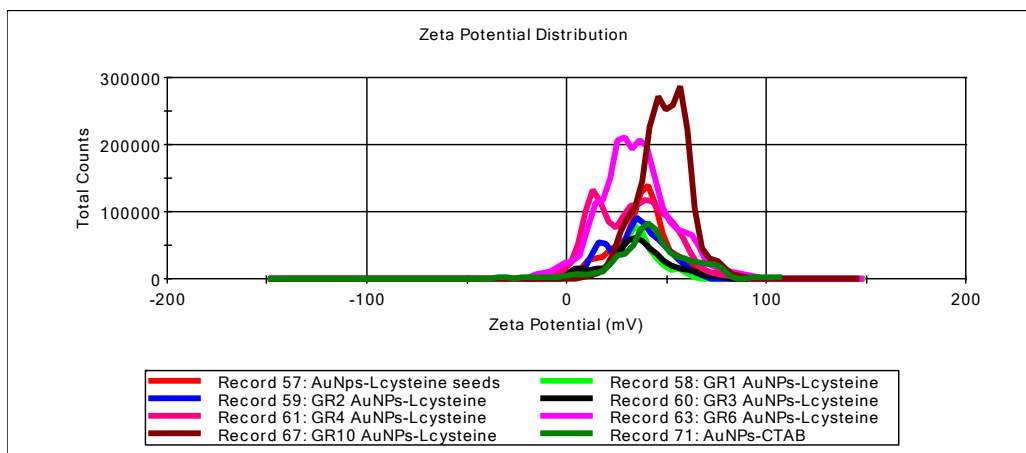

**Figure S2.** (a) Size distribution by intensity for Au NPs-L-cysteine methyl ester hydrochloride samples produced in this study and used for cytotoxicity assay. (b) and (c) Zeta potential of Au-L-cysteine

nanoparticles. The sample (Au NPs-CTAB) ~60 nm was used as negative control for cytotoxicity study.

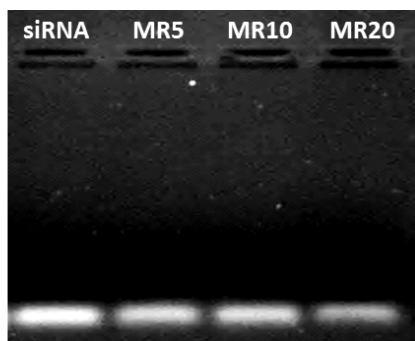

**Figure S3.** Complexation of siRNA (0.25  $\mu\text{g}$ ) with a GR8 nanoparticle sample at different mass ratios (MRs of Au to siRNA, MR = 5, 10 and 20). 0.25  $\mu\text{g}$  of siRNA was used as negative control.

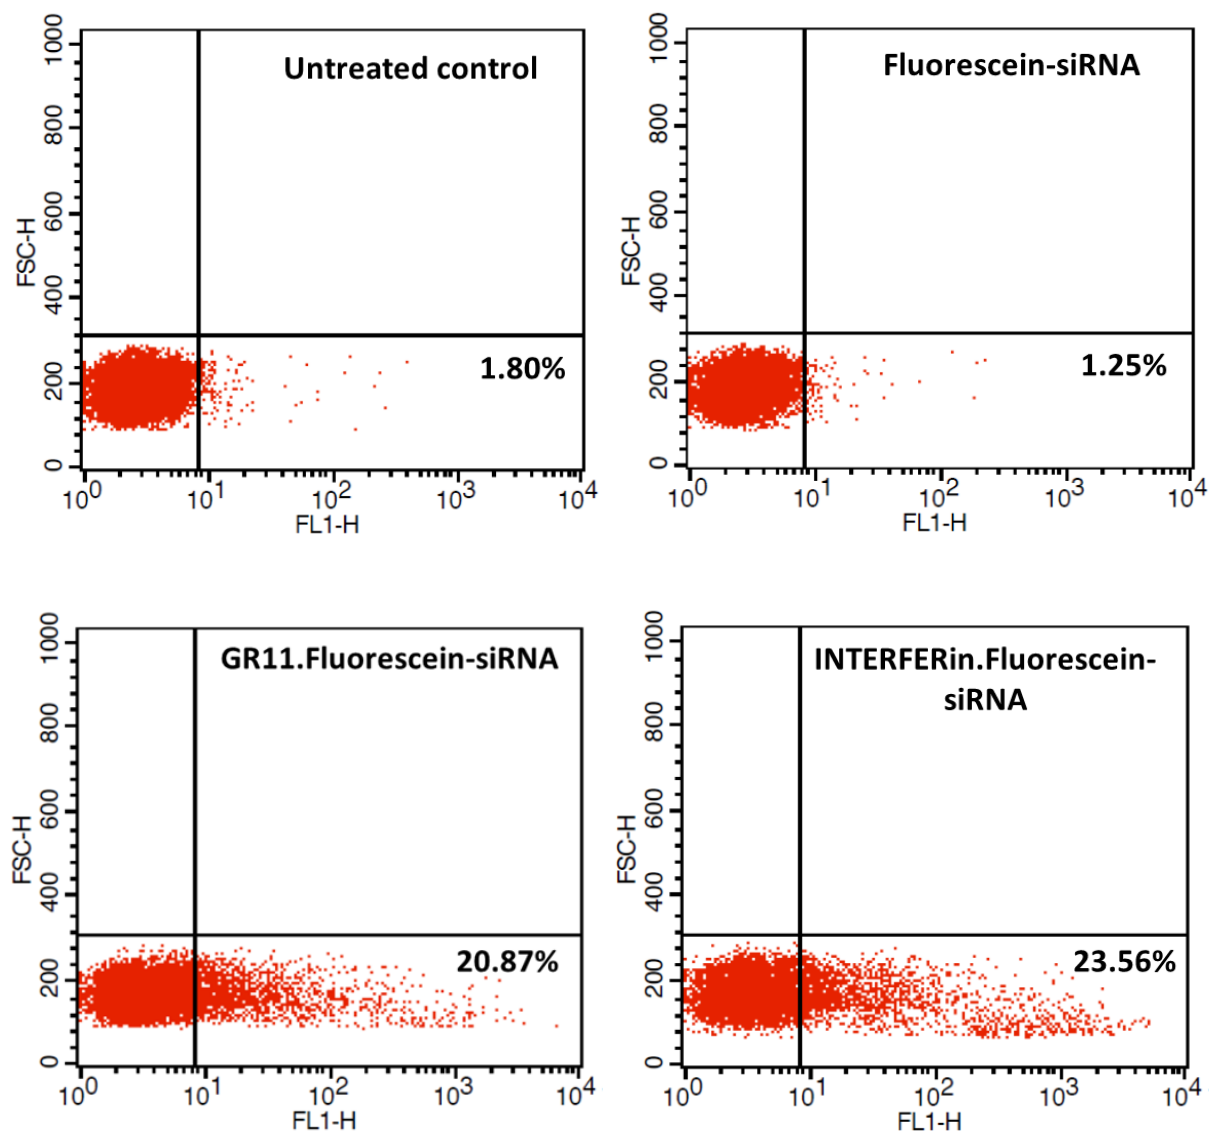

**Figure S4.** The representative Dot Plots showing fluorescein-positive cells (%) resulting from fluorescein-siRNA (20 nM) either uncomplexed or complexed with GR11 (MR20) and INTERFERin™.

We noted that samples of Au NPs- L-cysteine (GR1-GR4) were stable for more than two weeks, whilst GR5-GR12 solutions were stable for more than four month when stored at 4 °C. Moreover, Au NP- L-cysteine samples with bigger diameters precipitate by gravity but could be redispersed easily with shaking without noticeable aggregation.
